# Supplementary material for: Consensus genetic linkage map construction and QTL mapping for plant height-related traits in linseed flax (Linum usitatissimum L.)
Source: PubMed Central journal article supplement (PMC6081803; doi:10.1186/s12870-018-1366-6), 2018-08-07

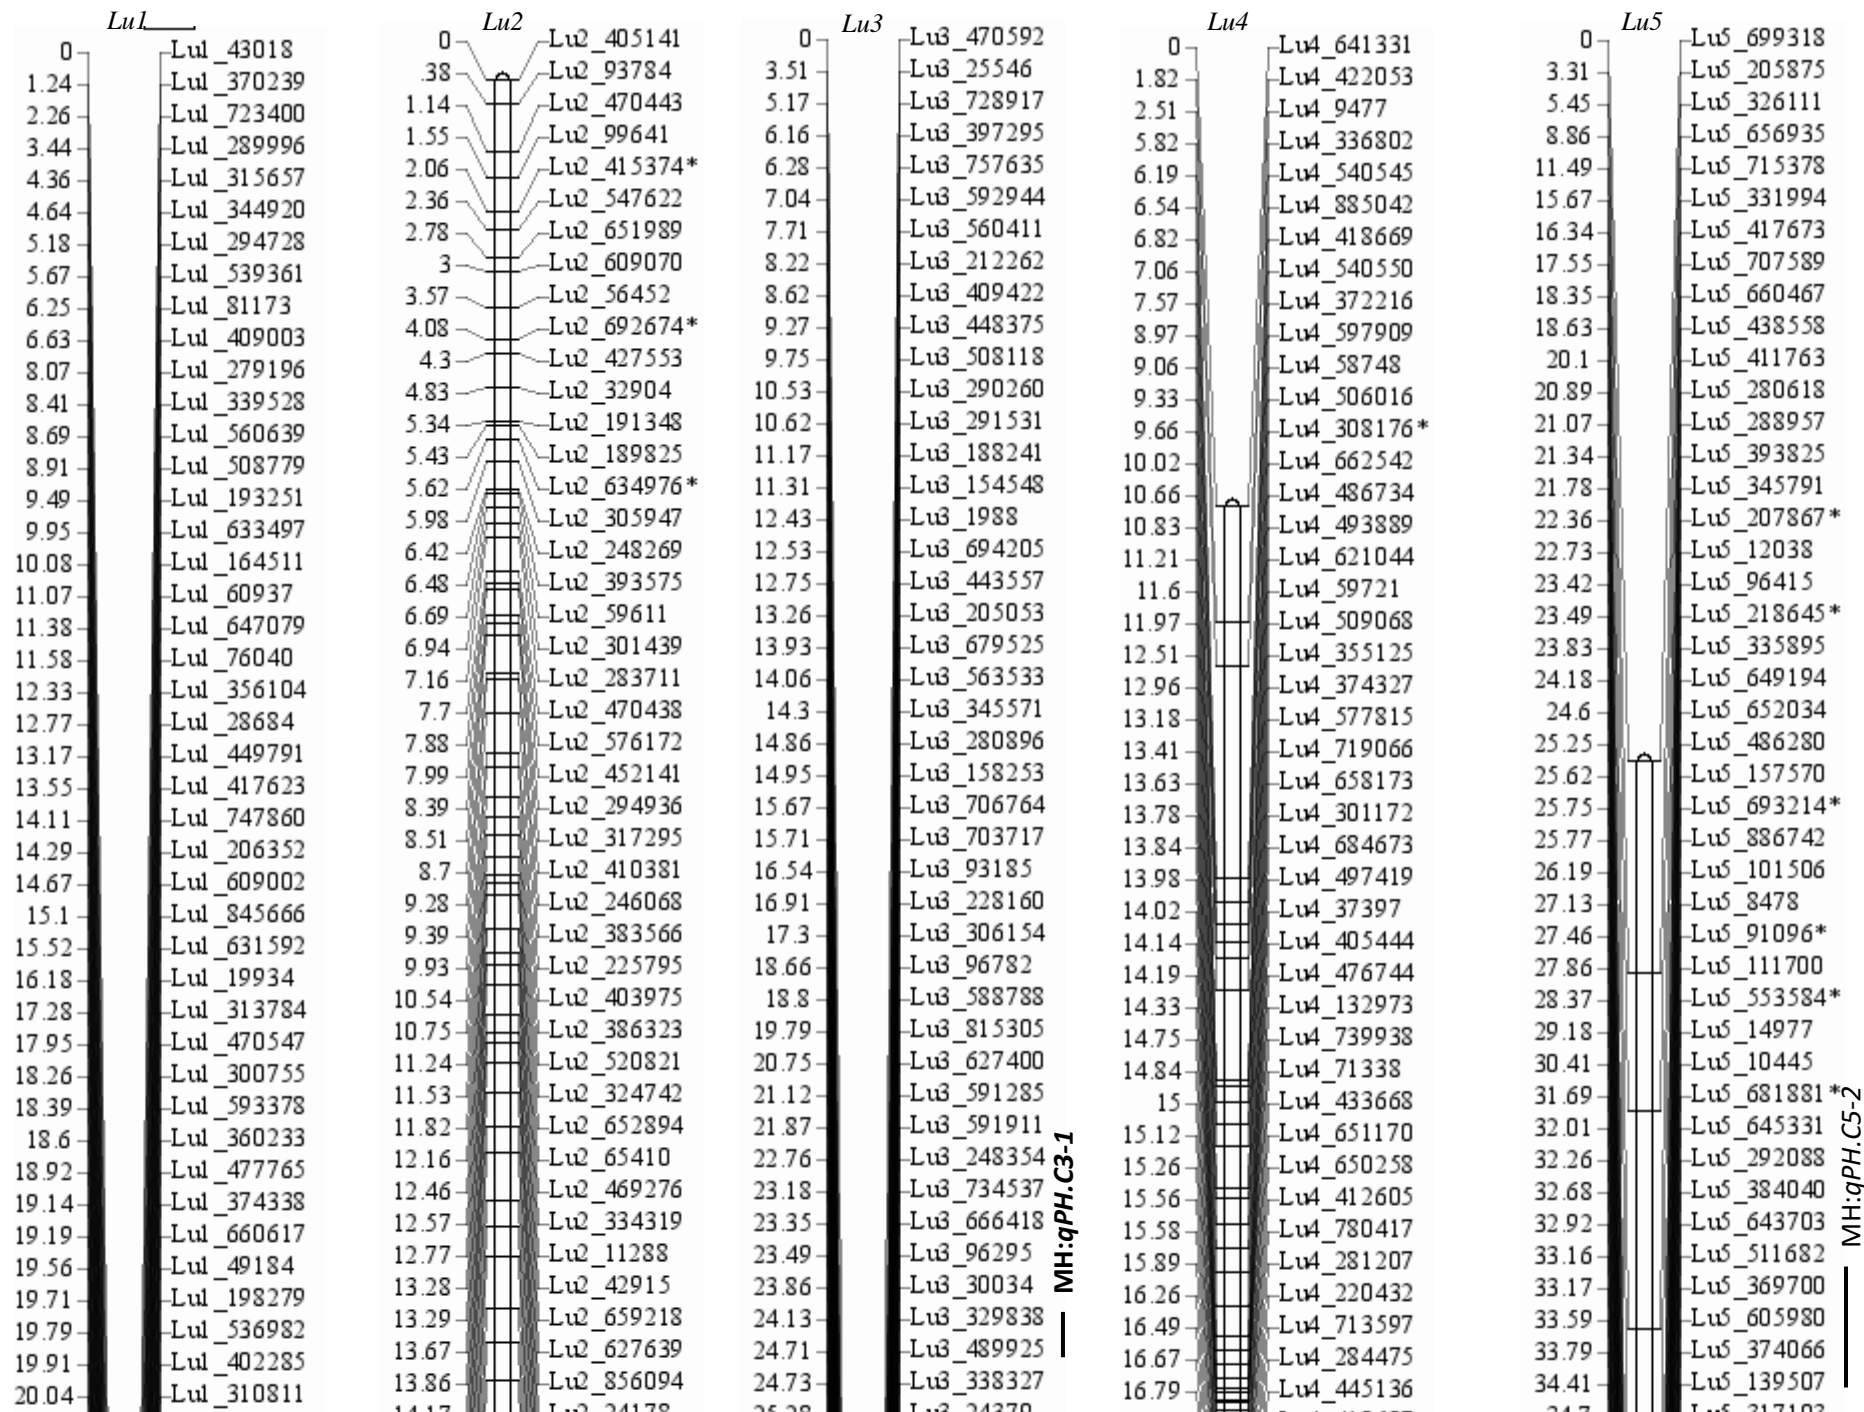

MH:qPH.C3-1

MH:qPH.C5-2

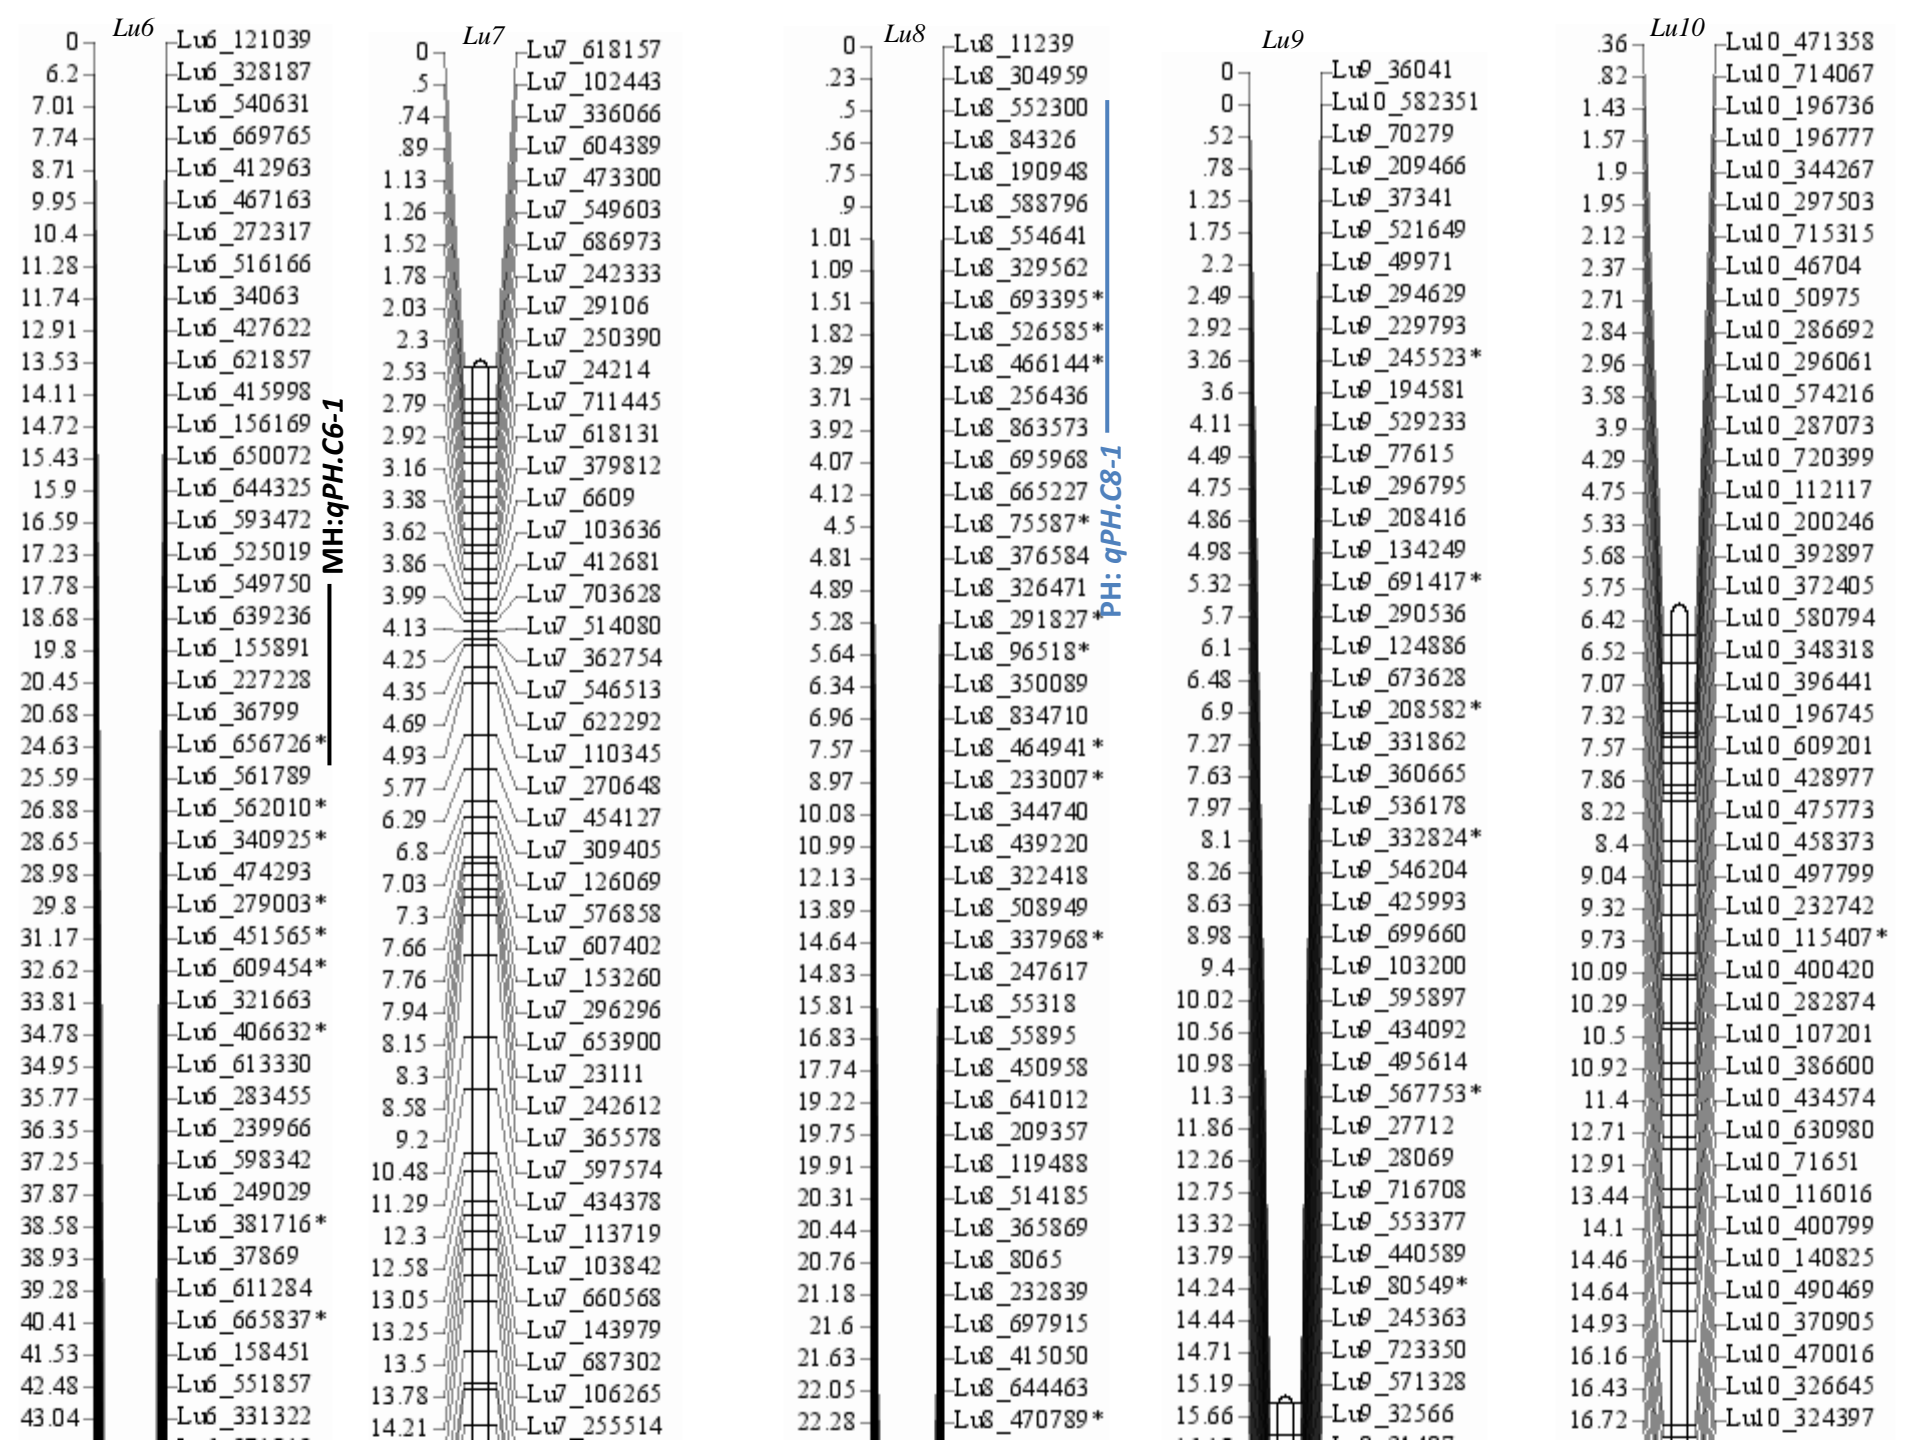

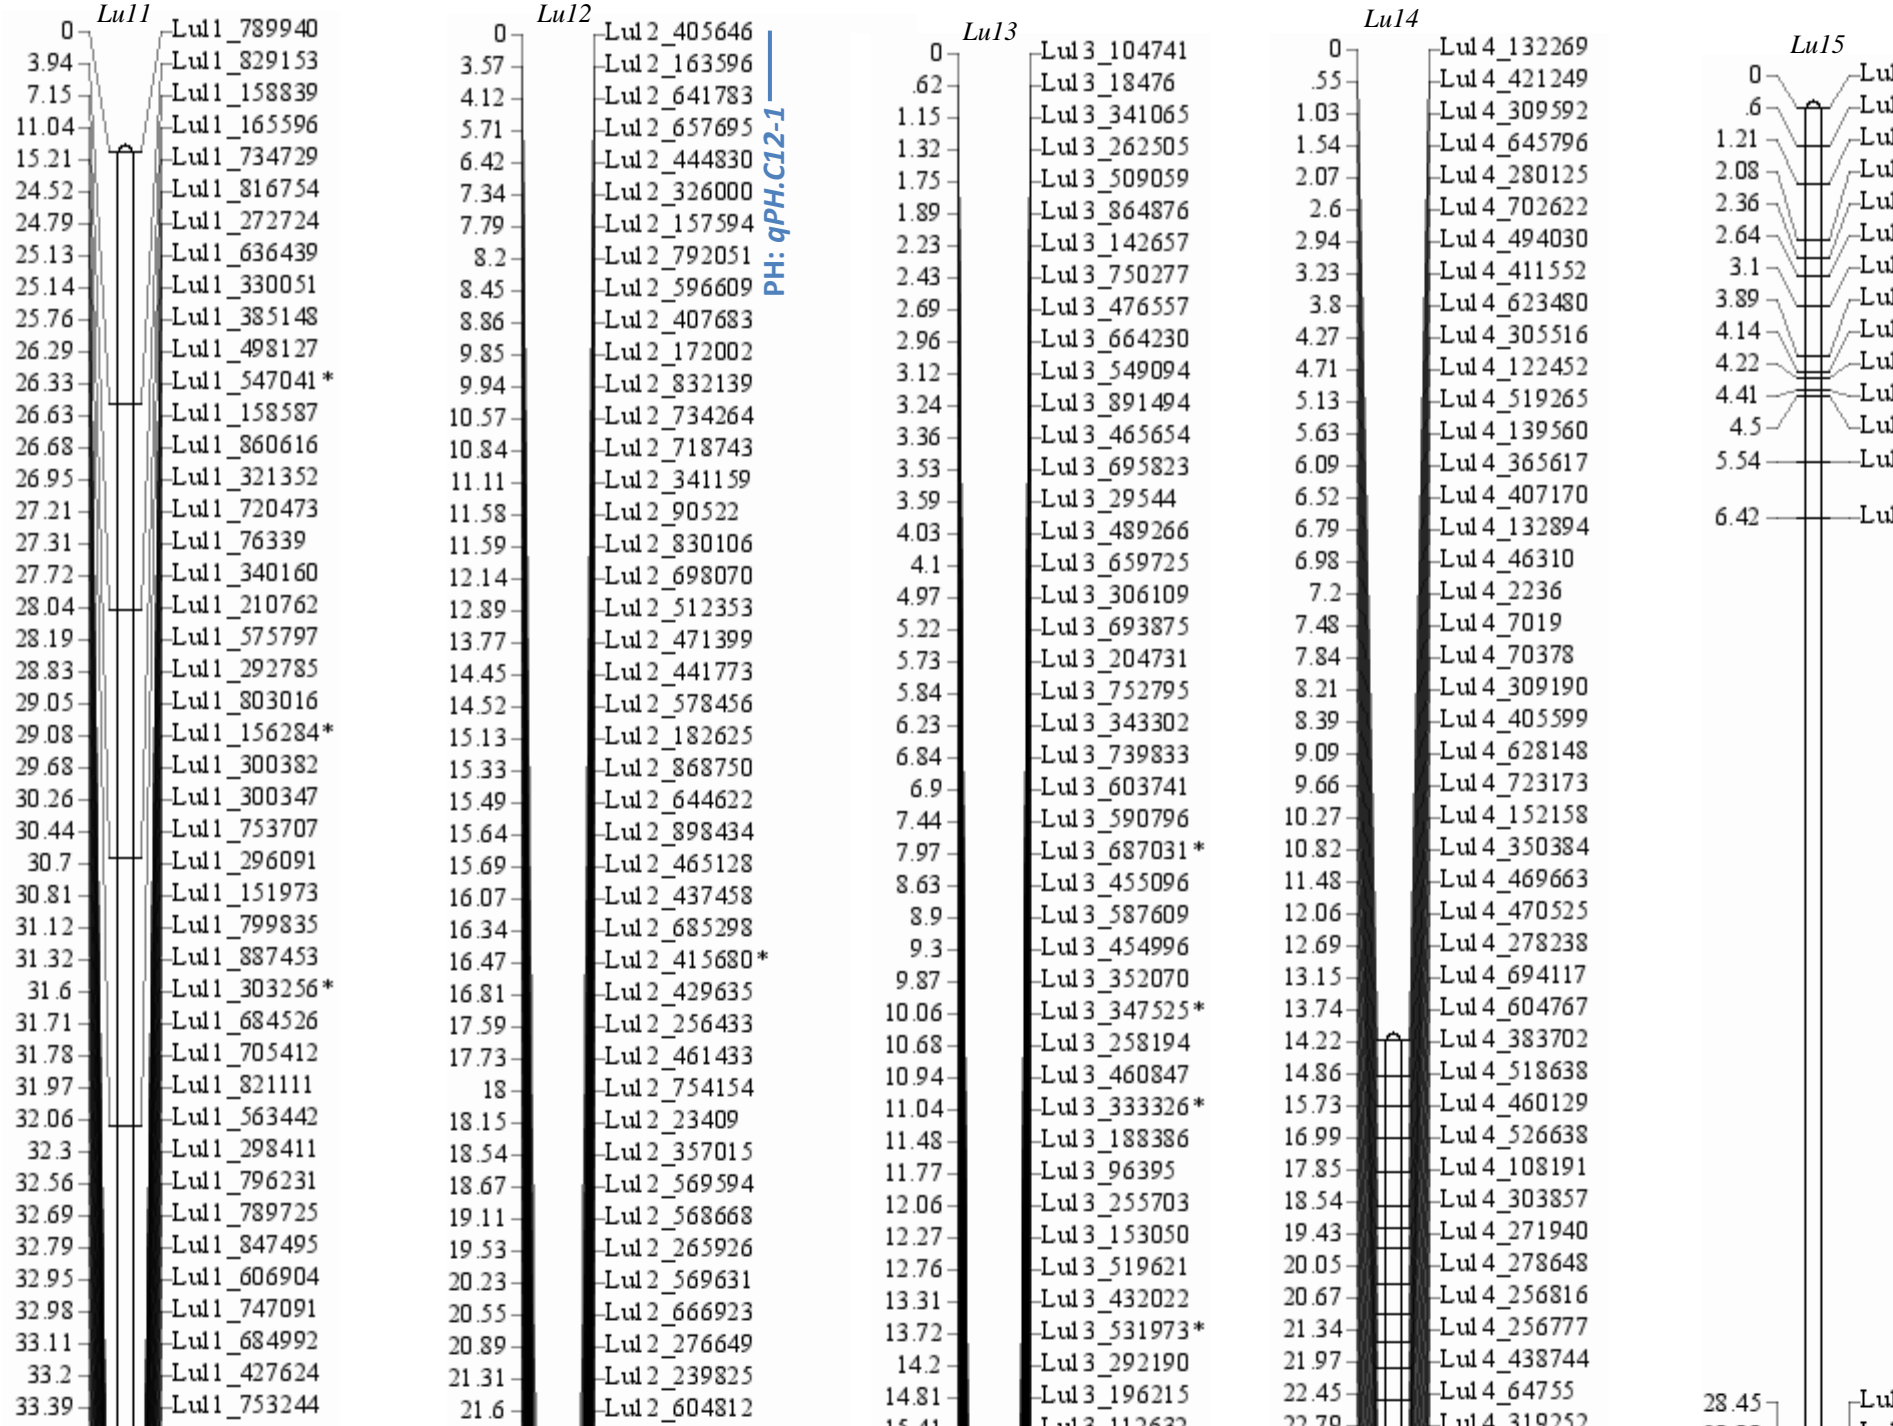

Supplement: 12870_2018_1366_MOESM1_ESM.pdf [file 12870_2018_1366_MOESM1_ESM.pdf]
